# Supplementary figures and images for: Generation of an induced pluripotent stem cell line NCHi003-A from a 11-year-old male with pulmonary atresia with intact ventricular septum (PA-IVS)
Source: PubMed Central journal article supplement — Stem Cell Res. Author manuscript; Available in PMC 2022 Nov 2. (PMC9629876; doi:10.1016/j.scr.2022.102893), 2022-08-10

# Mycoplasma test

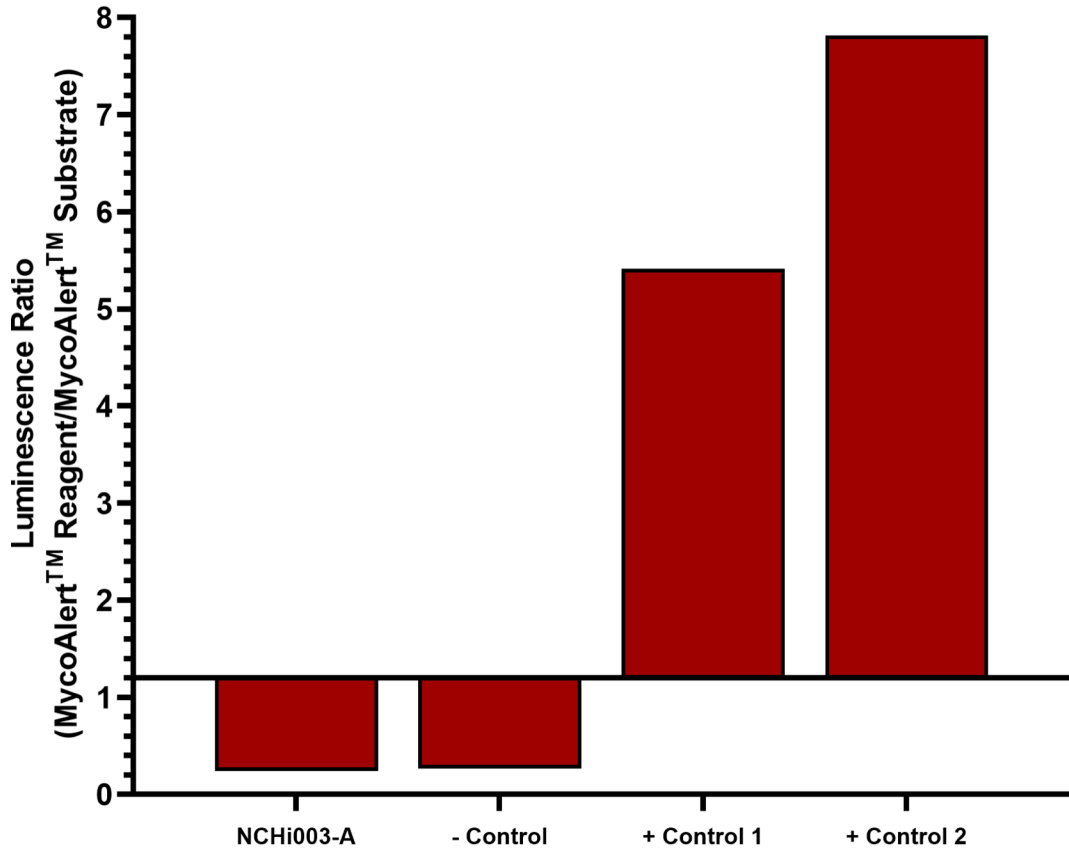

Interpretation

|          |          |          |          |
|----------|----------|----------|----------|
| Negative | Negative | Positive | Positive |
|----------|----------|----------|----------|

Supplement: NIHMS1844014-supplement-1.pdf [file NIHMS1844014-supplement-1.pdf]
